# Supplementary material
Source: HighWire-hosted journal article supplement (http://rc.rcjournal.com/highwire/filestream/28212/field_highwire_adjunct_files/1/rc-11698-File006.docx)
Supplement: rc-11698-File006.docx [file rc-11698-File006.docx]

| Encounter characteristics | Overall Cases  *n* = 691,118 | Yes, Invasive Mechanical Ventilation  *n* = 86,852 12.6% | No, Invasive Mechanical Ventilation  *n* = 604,266  87.4% | *p* |
| --- | --- | --- | --- | --- |
| Sex assigned at birth, *n (%)*  Female  Male | 310,536 (44.9)  380,556 (55.1) | 37,559 (43.2)  49,283 (56.7) | 272,977 (45.1)  331,273 (54.8) | <0.001 |
| Race categories, *n (%)*  American Indian or Alaska Native  Asian  Asian/Indian/Pacific Islander  Black/African American  Hispanic or Latino  Native Hawaiian / Pacific Islander  Other/Mixed  Unspecified  White  Not Collected | 6,057 (0.9)  19,090 (2.8)  5,535 (0.8)  115,745 (16.8)  86,613 (12.2)  2,747 (0.4)  54,315 (7.9)  28,440 (4.1)  307,035 (44.4)  67,541 (9.8) | 950 (1.1)  2,258 (2.6)  723 (0.8)  15,648 (18.0)  10,221 (11.8)  367 (0.4)  6,687 (7.7)  4,155 (4.8)  36,894 (42.5)  8,949 (10.3) | 5,107 (0.9)  16,832 (2.8)  4,812 (0.8)  100,097 (16.6)  74,392 (12.3)  2,380 (0.4)  47,628 (7.9)  24,285 (4.0)  270,141 (44.7)  58,592 (9.7) | <0.001 |
| Hispanic or Latino, *n (%)* | 49,995 (7.2) | 5,675 (6.5) | 44,280 (7.3) | <0.001 |
| Pediatric age group, *n (%)*  Infant: 30 days to < 1 year  Child: 1 year to < 12 years  Adolescent: 12 years to < 18 years | 149,310 (21.6)  353,870 (51.2)  187,938 (27.2) | 27,913 (32.1)  40,345 (46.5)  18,594 (21.4) | 121,397 (20.1)  313,525 (51.9)  169,344 (28.0) | <0.001 |
| Institution region, *n (%)*  North American, non-US (*n* = 4)  Midwest (*n* = 33)  Northeast (*n* = 15)  South (*n* = 42)  West (*n* = 48) | 12,358 (1.8)  192,377 (27.8)  57,511 (8.3)  214,549 (31.0)  214,323 (31.0) | 2,377 (2.7)  24,234 (27.9)  6,715 (7.7)  30,084 (34.6)  23,442 (27.0) | 9,981 (1.7)  168,143 (27.8)  50,796 (8.4)  184,465 (30.5)  190,881 (31.6) | <0.001 |
| Institution size (by tertile), *n (%)*  Small (*n* = 48 centers)  Medium (*n* = 47 units)  Large (*n* = 47 centers) | 59,026 (8.5)  184,125 (26.6)  447,967 (64.8) | 5,746 (6.6)  21,083 (24.3)  60,023 (69.1) | 53,280 (8.8)  163,042 (27.0)  387,944 (64.2) | <0.001 |

**Supplemental Table 2.** General demographic data with comparison by cohorts defined by invasive mechanical ventilation during PICU admission. [US: United States]
